# Supplementary material for: Characterization of Nine Compounds Isolated from the Acid Hydrolysate of Lonicera fulvotomentosa Hsu et S. C. Cheng and Evaluation of Their In Vitro Activity towards HIV Protease
Source: PubMed Central journal article supplement (PMC6943440; doi:10.3390/molecules24244526), 2019-12-11

## Supplementary materials

**Table S1.** Docking score, GLIDE score and GLIDE Emodel of ethyl caffeate, caffeic acid and isovanillin isolated from *Lonicera fulvotomentosa* Hsu et S. C. Cheng towards HIV protease.

| Compounds             | HIV protease  |             |                        |
|-----------------------|---------------|-------------|------------------------|
|                       | Docking score | GLIDE score | GLIDE Emodel (Kal/mol) |
| <b>Ethyl caffeate</b> |               |             |                        |
| Pose 1                | -5.841        | -5.844      | -44.875                |
| Pose 2                | -5.573        | -5.576      | -44.431                |
| Pose 3                | -5.470        | -5.473      | -44.139                |
| Pose 4                | -5.311        | -5.314      | -44.925                |
| Pose 5                | -5.248        | -5.251      | -46.826                |
| <b>Caffeic acid</b>   |               |             |                        |
| Pose 1                | -5.576        | -5.576      | -39.332                |
| Pose 2                | -5.505        | -5.505      | -41.301                |
| Pose 3                | -5.447        | -5.447      | -39.747                |
| Pose 4                | -5.222        | -5.222      | -37.197                |
| Pose 5                | -5.090        | -5.090      | -36.156                |
| <b>Isovanillin</b>    |               |             |                        |
| Pose 1                | -6.109        | -6.112      | -34.995                |
| Pose 2                | -6.015        | -6.019      | -33.160                |
| Pose 3                | -5.986        | -5.989      | -34.585                |
| Pose 4                | -5.537        | -5.540      | -34.236                |
| Pose 5                | -5.507        | -5.540      | -31.349                |

# Supplementary materials

Figure S1. Characterization of Compound 4

## $^1\text{H-NMR}$

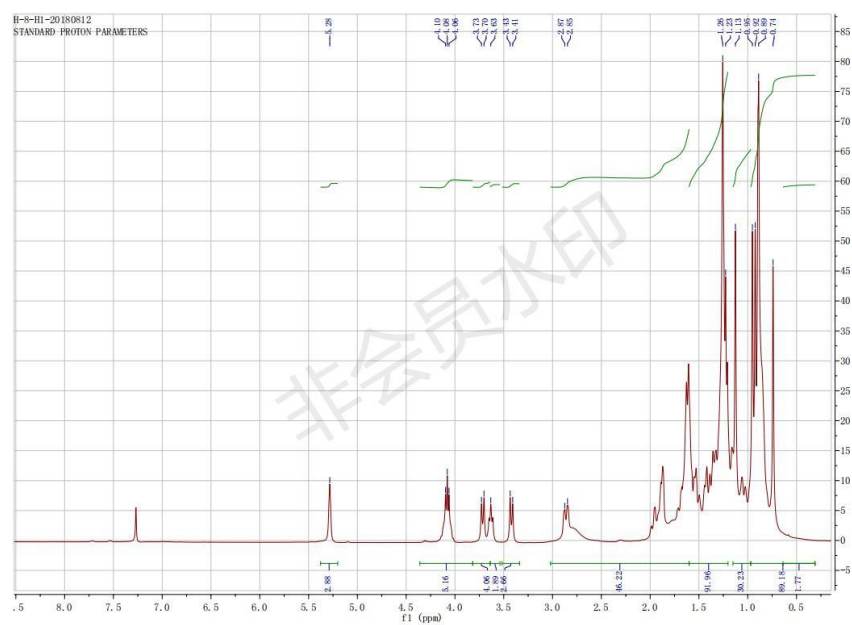

## $^{13}\text{C-NMR}$

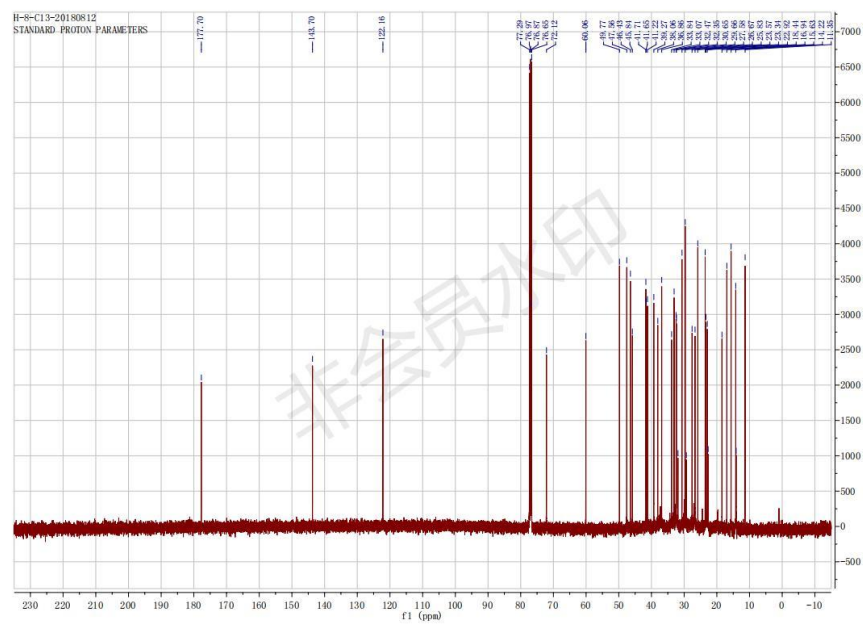

# HMQC

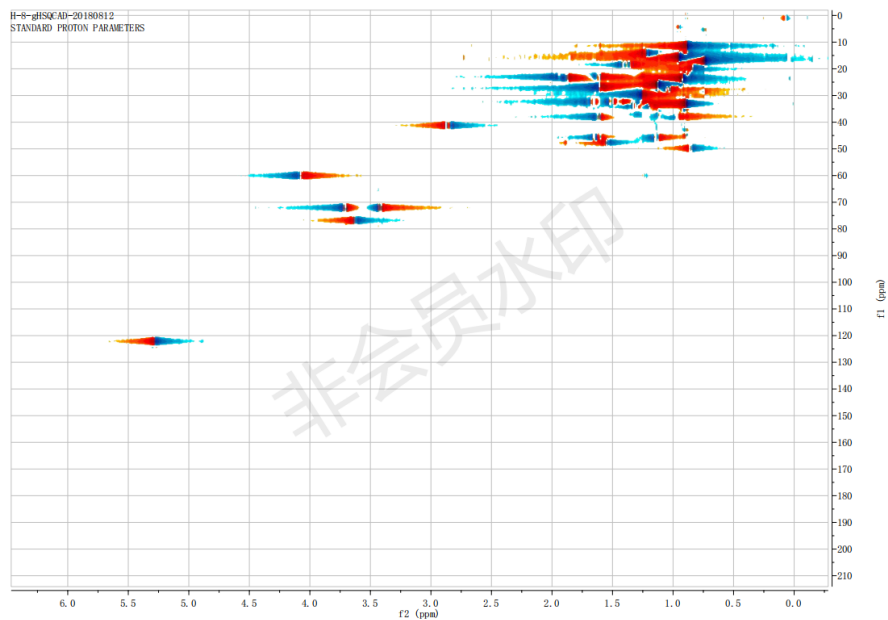

# HMBC

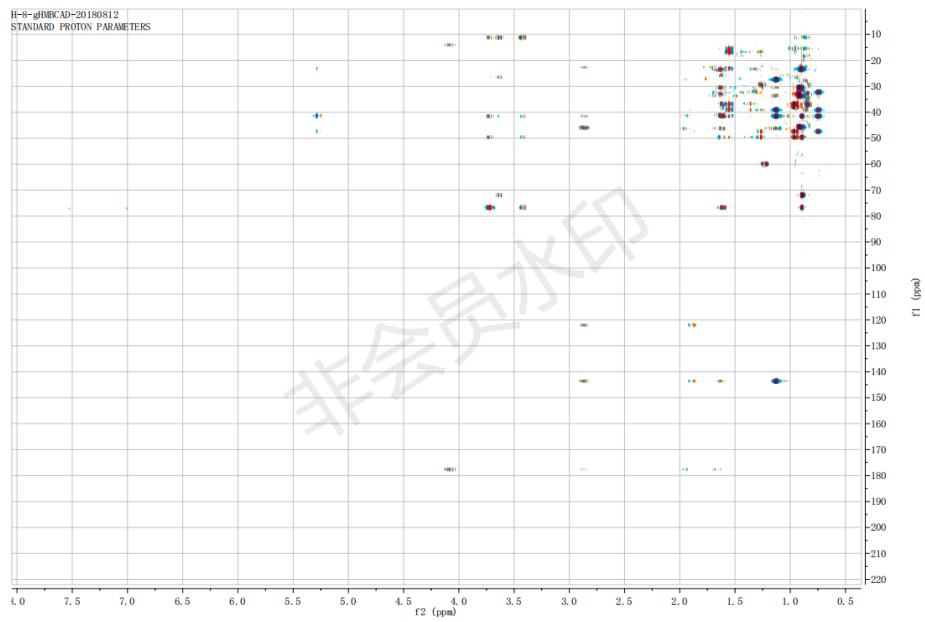

# GCOSY

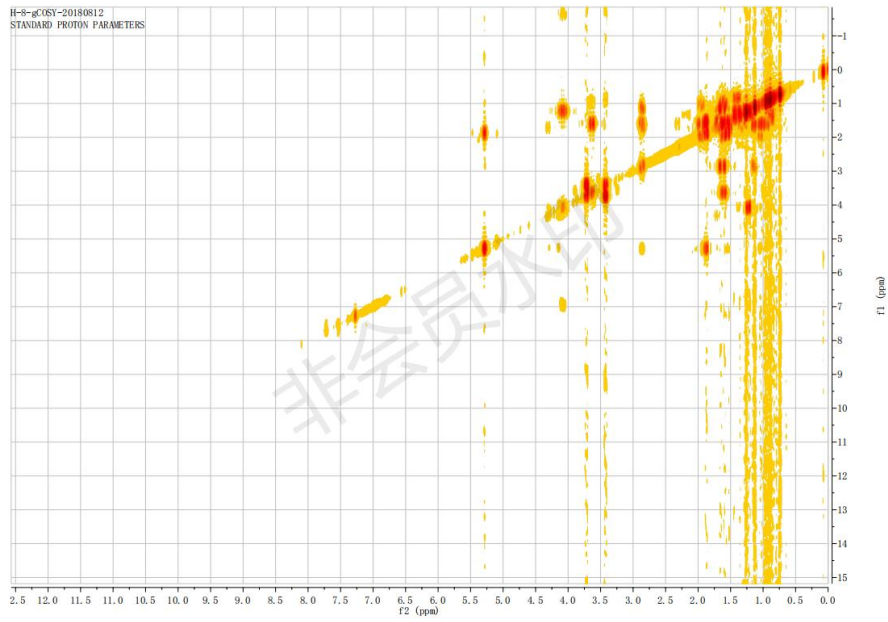

# HR-MS

H-8\_180724153013 #123 RT: 0.57 AV: 1 NL: 2.06E8  
T: FTMS + p ESI Full ms (320.0000-1200.0000)

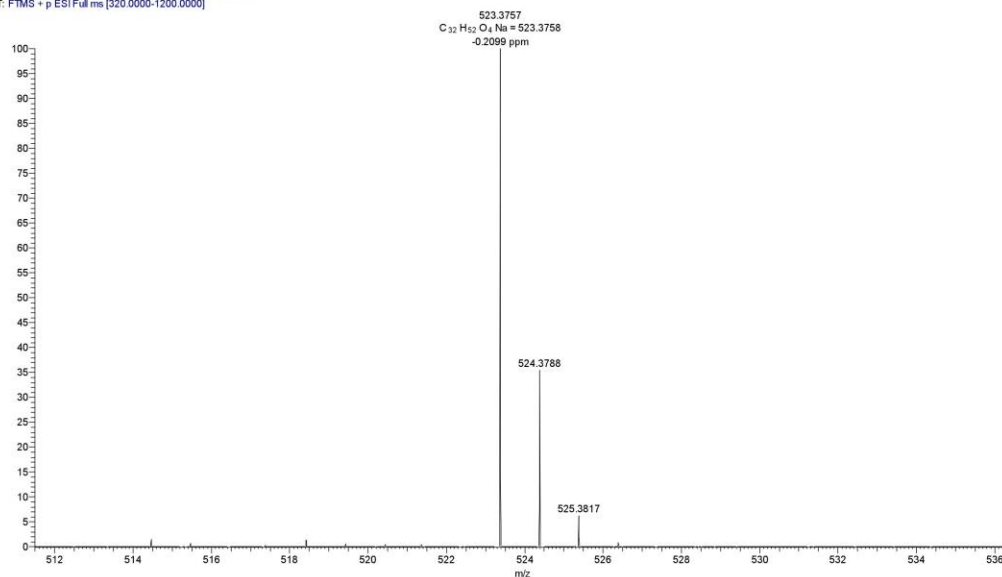

Supplement: molecules-24-04526-s001.pdf [file molecules-24-04526-s001.pdf]
